# Supplementary material for: Therapeutic Potential of Targeting the Cytochrome P450 Enzymes Using Lopinavir/Ritonavir in Colorectal Cancer: A Study in Monolayers, Spheroids and In Vivo Models
Source: MDPI journal article supplement (doi:10.3390/cancers15153939), 2023-08-02
Supplement: s1 [file s1 › cancers-2510145-supplementary.pdf]

**Table S1. Clinicopathological characteristics**

| <b>Clinicopathological Variables</b> | <b>No. of patients (%)<br/>/mean <math>\pm</math> SD</b> |
|--------------------------------------|----------------------------------------------------------|
| Patients                             | 22                                                       |
| Mean age (Years, mean $\pm$ SD)      | 58.61 $\pm$ 1.34                                         |
| Sex                                  |                                                          |
| Male                                 | 12 (54.5)                                                |
| Female                               | 10 (45.5)                                                |
| Grade                                |                                                          |
| Poorly Differentiated                | 2 (9.0)                                                  |
| Moderately Differentiated            | 14 (63.6)                                                |
| Well Differentiated                  | 6 (27.2)                                                 |
| Depth of tumor invasion (T)          |                                                          |
| T1                                   | 0                                                        |
| T2                                   | 5 (22.7)                                                 |
| T3                                   | 12 (54.5)                                                |
| T4                                   | 2 (9.0)                                                  |
| Lymph node involvement (N)           |                                                          |
| Yes                                  | 16 (72.7)                                                |
| No                                   | 6 (27.2)                                                 |
| Metastasis (M)                       |                                                          |
| Yes                                  | 8 (36.5)                                                 |
| No                                   | 14 (63.3)                                                |
| Family history                       |                                                          |
| Yes                                  | 2 (6.6)                                                  |
| No                                   | 28 (93.3)                                                |
